# Supplementary material for: Hydrogenated CoOx nanowire@Ni(OH)2 nanosheet core–shell nanostructures for high-performance asymmetric supercapacitors
Source: Royal Society of Chemistry journal article supplement (doi:10.1039/c4nr00771a), 2014-01-01
Supplement: c4nr00771a1.pdf [file c4nr00771a1.pdf]

Electronic Supplementary Information (ESI)

## Hydrogenated $\text{CoO}_x$ nanowire @ $\text{Ni}(\text{OH})_2$ nanosheet core-shell nanostructures for high-performance asymmetric supercapacitors

Jianxiao Zhu, Lei Huang,\* Yuxiu Xiao, Leo Shen, Qi Chen and Wangzhou Shi

*Joint Lab with Wuhu Token for Graphene Electrical Materials and Application, Department of Physics, Shanghai Normal University, Guilin Road 100, Shanghai 200234, China.*

*E-mail: leihuang@shnu.edu.cn; elhuang68@yahoo.com.sg; Fax: +86 21 6432 8968.*

**Preparation of H- $\text{Co}_3\text{O}_4$  NWs.** First, self-supported  $\text{Co}_3\text{O}_4$  NW arrays were prepared by a facile hydrothermal synthesis method.<sup>1</sup> The reaction solution was obtained by mixing 3 mmol of  $\text{Co}(\text{NO}_3)_2 \cdot 6\text{H}_2\text{O}$ , 6 mmol of  $\text{NH}_4\text{F}$ , and 15 mmol of  $\text{CO}(\text{NH}_2)_2$  in 80 mL of distilled water and then transferred into Teflon-lined stainless steel autoclave liners. Two pieces of nickel foam ( $1.2 \times 6 \text{ cm}^2$  in sizes) were immersed into the reaction solution. Before use, Nickel foam ( $1.2 \times 6 \text{ cm}^2$ ) was carefully cleaned with concentrated HCl solution (37 wt%) in an ultrasound bath for 5 min in order to remove the surface NiO layer, and then deionized water and absolute ethanol were used for 5 min each to ensure the surface of the Ni foam was well cleaned. The liner was sealed in a stainless steel autoclave and maintained at 120 °C for 5 h and then cooled down to room temperature. The samples were collected and cleaned with distilled water and ethanol in an ultrasound bath for 5 min each. Finally, the samples were annealed at 350 °C in normal purity argon for 2 h.

**Preparation of graphite oxide (GO).** GO was synthesized from purified natural graphite (SP-1, Bay Carbon, MI) by the modified Hummers method.<sup>2</sup>  $\text{H}_2\text{SO}_4$  (75 mL) was added into the 250 mL flask filled with graphite (3 g) at room temperature, followed by addition of solid  $\text{KMnO}_4$  (12 g) slowly at 0 °C (ice bath). After increase of temperature to 35 °C, the mixture was stirred by magnetic stirring bar for 15 h. Excess water was added into the mixture at 0 °C (ice bath), causing violent effervescence and an increase in temperature to 98 °C, maintained at this temperature for 15 minutes. And then  $\text{H}_2\text{O}_2$  (30 wt% in water) was added until there was no gas producing. Filtration with glass filter afforded brown powder (GO) and the GO powder was dried in the vacuum at room temperature for 24 h.

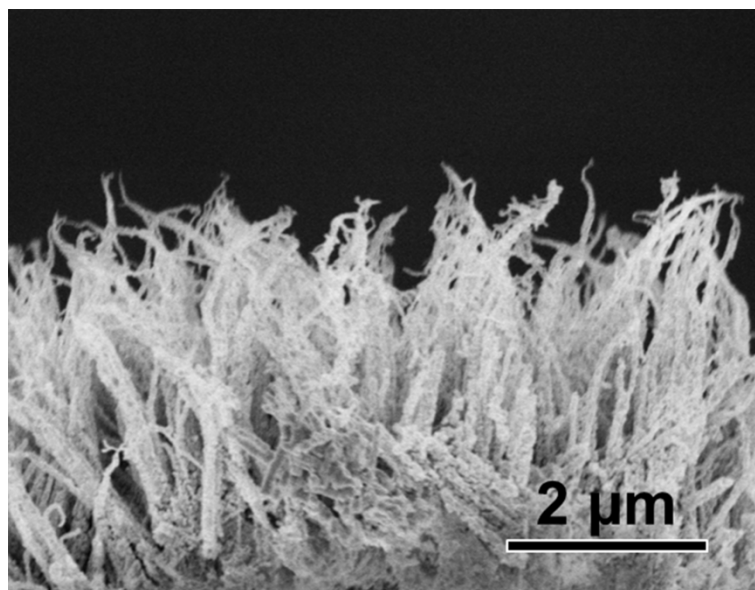

**Fig. S1** FESEM cross section image of H-CoO<sub>x</sub> NWs.

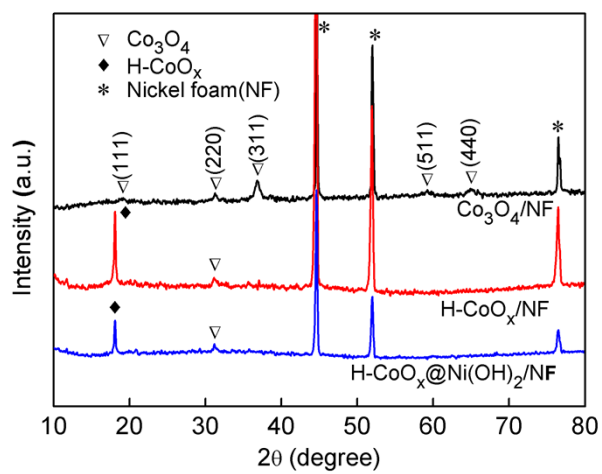

**Fig. S2** XRD of Co<sub>3</sub>O<sub>4</sub>, H-CoO<sub>x</sub>, H-CoO<sub>x</sub>@Ni(OH)<sub>2</sub>.

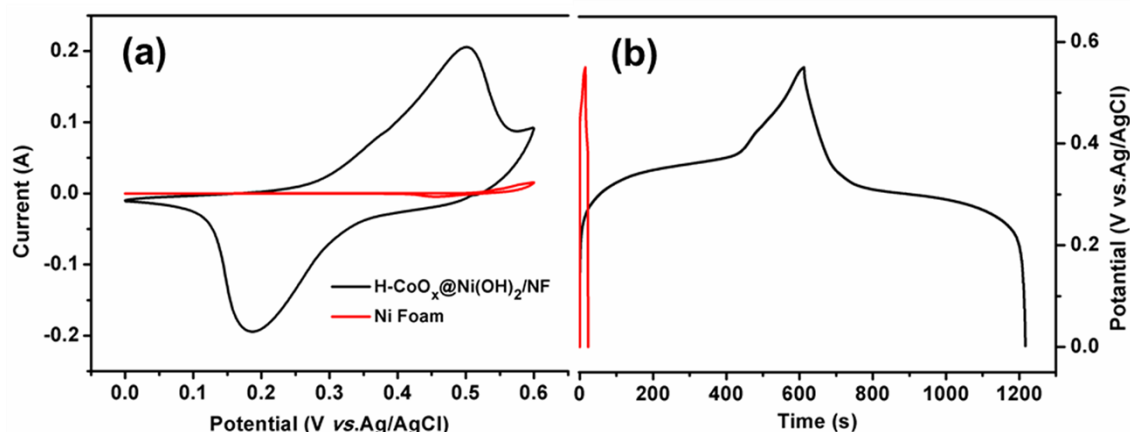

**Fig. S3** (a) CVs of H-CoO<sub>x</sub>@Ni(OH)<sub>2</sub> on nickel foam and bare nickel foam (underwent hydrothermal and high temperature postannealing processes) at scan rate of 10 mV s<sup>-1</sup> (b) Charge-discharge curves of H-CoO<sub>x</sub>@Ni(OH)<sub>2</sub> on nickel foam and bare nickel foam at constant current of 7.52 mA.

#### Calculation of the specific capacitance of H-CoO<sub>x</sub>@Ni(OH)<sub>2</sub>.

$C_{sp}$  (The specific capacitances) and  $C_A$  (the areal capacitance) were calculated from the galvanostatic discharge curves using Eq. (S-1) and Eq. (S-2), where  $I$  is the applied current,  $V/\Delta t$  is the slope of the discharge curve,  $m$  is the mass of the samples on the electrode, and  $A$  is the geometrical area of the electrode (cm<sup>2</sup>):

$$C_{sp} = I\Delta t / (mV) \quad (\text{S-1})$$

$$C_A = I\Delta t / (AV) \quad (\text{S-2})$$

Considering that in our hybrid electrode with 1.44 cm<sup>2</sup> area, the mass of the mixture, H-CoO<sub>x</sub> and Ni(OH)<sub>2</sub> is 3.76 mg, 2.01 mg and 1.75 mg, respectively, then, we obtained the capacitance of the hybrid:

$$C_{sp} = I\Delta t / (mV) = (0.00752 \text{ A} \cdot 604 \text{ s}) / (0.00376 \text{ g} \cdot 0.55 \text{ V}) = 2196 \text{ F g}^{-1} \quad (\text{At } 2 \text{ A g}^{-1} \text{ in Fig. 5e})$$

$$C_A = I\Delta t / (AV) = (0.00752 \text{ A} \cdot 604 \text{ s}) / (1.44 \text{ cm}^2 \cdot 0.55 \text{ V}) = 5.73 \text{ F cm}^{-2} \quad (\text{At } 2 \text{ A g}^{-1})$$

At the current density of 2 A g<sup>-1</sup>, H-CoO<sub>x</sub> and Ni(OH)<sub>2</sub> could obtain a capacitance of 944 F g<sup>-1</sup> and 1760 F g<sup>-1</sup>, respectively. If we could simply add H-CoO<sub>x</sub> and Ni(OH)<sub>2</sub> with the same mass ratio to that in the hybrid structure, the capacitance of the mixture ( $C$ ) would be calculated as,

$$C = (944 \cdot 2.01 + 1760 \cdot 1.75) / 3.76 = 1324 \text{ F g}^{-1} < 2196 (C_{sp})$$

The result is poorer than the data we get from the hybrid structure, which may be attributed to synergistic effects of the atomic mixture of Ni(OH)<sub>2</sub> and H-CoO<sub>x</sub>.

Table 1. The ESR ( $R_e$ ) and the  $C_{sp}$  (at 2 A g<sup>-1</sup>) of the different electrode materials.

| Electrode                                  | Co <sub>3</sub> O <sub>4</sub> | H-CoO <sub>x</sub>    | Ni(OH) <sub>2</sub>    | H-CoO <sub>x</sub> @Ni(OH) <sub>2</sub> | H-CoO <sub>x</sub> @Ni(OH) <sub>2</sub> -5h |
|--------------------------------------------|--------------------------------|-----------------------|------------------------|-----------------------------------------|---------------------------------------------|
| $R_e$                                      | 0.70 Ω                         | 0.48 Ω                | 1.17 Ω                 | 0.55 Ω                                  | 0.94 Ω                                      |
| $C_{sp}$                                   | 486 F g <sup>-1</sup>          | 944 F g <sup>-1</sup> | 1760 F g <sup>-1</sup> | 2196 F g <sup>-1</sup>                  | 1830 F g <sup>-1</sup>                      |
| $m_{\text{Ni(OH)}_2} : m_{\text{H-CoO}_x}$ | --                             | --                    | 1:0                    | 1:0.87                                  | 1:1.3                                       |

### RGO@Fe<sub>3</sub>O<sub>4</sub> nanocomposites for negative electrode

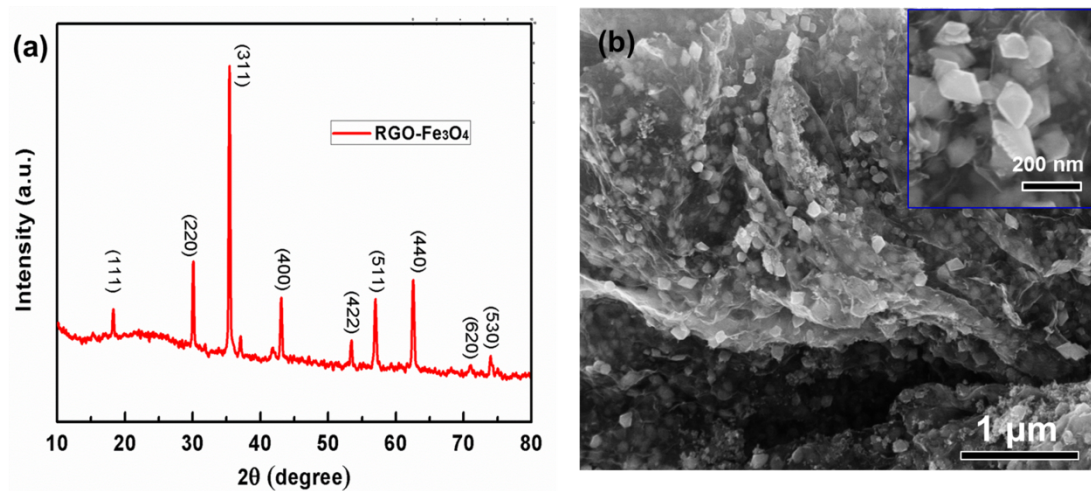

**Fig. S4** (a) XRD of RGO@Fe<sub>3</sub>O<sub>4</sub> nanocomposites. It shows the X-ray diffraction (XRD) of RGO@Fe<sub>3</sub>O<sub>4</sub>, which reveals that all the peaks of the RGO@Fe<sub>3</sub>O<sub>4</sub> nanocomposites can be assigned to Fe<sub>3</sub>O<sub>4</sub> (JCPDS no. 65-3107). Due to the little content of RGO, there are no obvious peaks in the range of 24–28 degree corresponding to graphene stacking. (b) FESEM of RGO@Fe<sub>3</sub>O<sub>4</sub> nanocomposites (Inset is magnified SEM image). The SEM images show that the small Fe<sub>3</sub>O<sub>4</sub> particles are spindle-like with sizes of 80-180 nm, and uniformly distributing in graphene nanosheets.

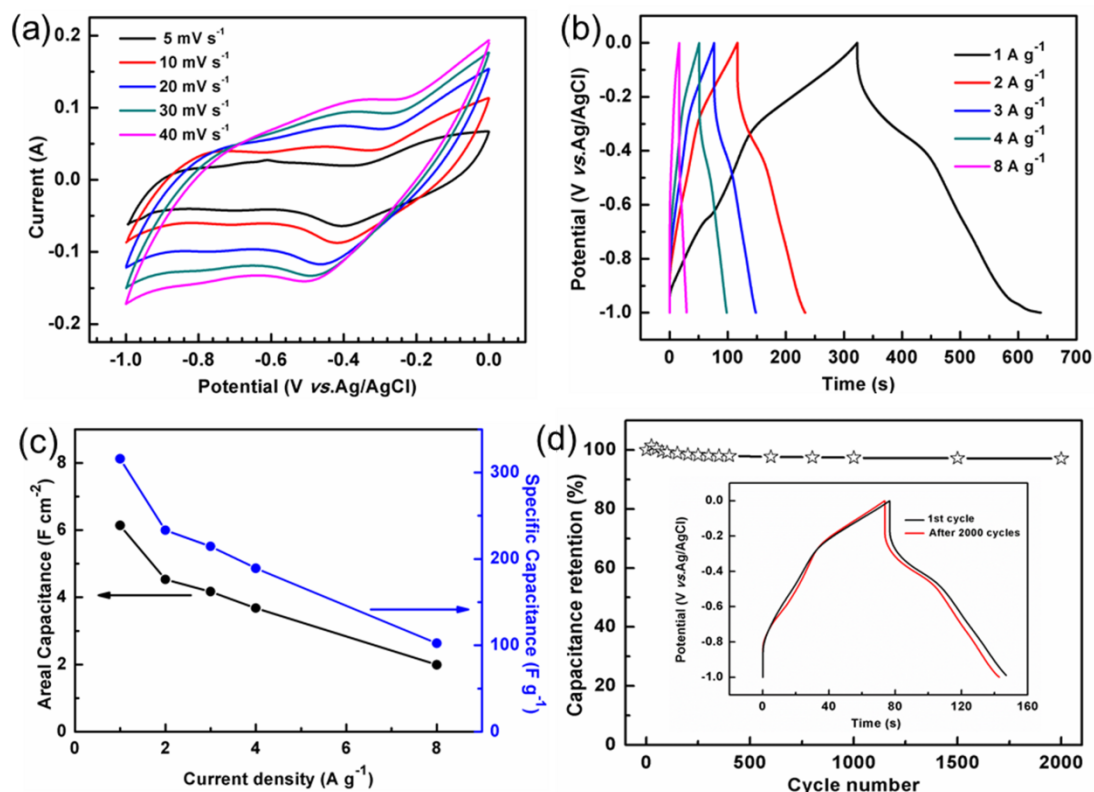

**Fig. S5** (a) CV curves of RGO@Fe<sub>3</sub>O<sub>4</sub> electrode at different scan rates. The CV curve of RGO@Fe<sub>3</sub>O<sub>4</sub> shows a roughly rectangular shape with a pair of small peaks, suggesting that the capacitance of RGO@Fe<sub>3</sub>O<sub>4</sub> electrode comes from not only electrical double-layer capacitance, but also faradaic pseudocapacitance. (b) Galvanostatic charge-discharge (GCD) curves of RGO@Fe<sub>3</sub>O<sub>4</sub> electrode at different current densities. The GCD curves exhibits a similar symmetry charge-discharge curve with three voltage stages. (c) Areal capacitance and specific capacitance calculated for the RGO@Fe<sub>3</sub>O<sub>4</sub> based on the galvanostatic charge-discharge curves as a function of current density. The RGO@Fe<sub>3</sub>O<sub>4</sub> electrode shows a specific capacitance of 316, 233, 214, 189, and 102 F g<sup>-1</sup> at different densities of 1, 2, 3, 4, and 8 A g<sup>-1</sup>, respectively (with high areal capacitance of 6.14 F cm<sup>-2</sup> at current density of 1 A g<sup>-1</sup>). (d) Cycling performance of RGO@Fe<sub>3</sub>O<sub>4</sub> electrode. Moreover, the RGO@Fe<sub>3</sub>O<sub>4</sub> electrode exhibits an excellent long cycle life with only 3% capacitance loss after 2000 cycles.

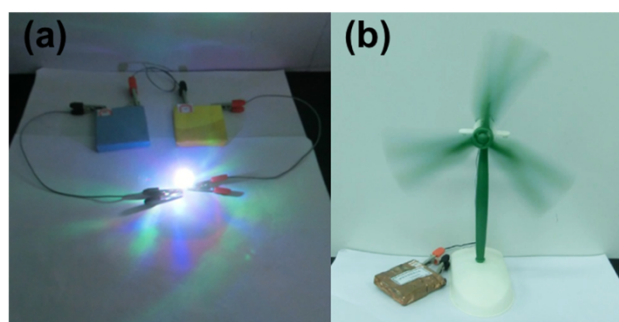

**Fig. S6** (a) A picture showing that two ASCs in series can lighten up a 3.2 V seven-color LED brightly. (b) one 22 cm<sup>2</sup> ASC device can drive a small windmill for 20 min after 1 min of charging by a pair of AA battery.

### References

- 1 X. H. Xia, J. P. Tu, Y. Q. Zhang, X. L. Wang, C. D. Gu, X. B. Zhao and H. J. Fan, *ACS Nano*, 2012, **6**, 5531.
- 2 S. Park, J. An, R. D. Piner, I. Jung, D. Yang, A. Velamakanni, S. T. Nguyen and R. S. Ruoff, *Chem. Mater.*, 2008, **20**, 6592.
